# Supplementary material for: Evaluation of Immunomagnetic Separation for the Detection of Salmonella in Surface Waters by Polymerase Chain Reaction
Source: Int J Environ Res Public Health. 2014 Sep 19;11(9):9811–21. doi: 10.3390/ijerph110909811 (PMC4199051; doi:10.3390/ijerph110909811)

## Evaluation of Immunomagnetic Separation for the Detection of Salmonella in Surface Waters by Polymerase Chain Reaction

**Table S1.** Nonparametric test results for Salmonella in terms of water quality parameters.

| Water Quality Parameters            | Salmonella Positive Negative                       |                                       | Mann-Whitney (U Test) |
|-------------------------------------|----------------------------------------------------|---------------------------------------|-----------------------|
| Heterotrophic plate counts (CFU/mL) | $2.0 \times 10^4 \pm 2.4 \times 10^4$ <sup>#</sup> | $5.0 \times 10^4 \pm 3.5 \times 10^2$ | 0.079                 |
| Total coliforms (CFU/100 mL)        | $2.3 \times 10^4 \pm 2.7 \times 10^4$              | $5.4 \times 10^4 \pm 2.5 \times 10^4$ | 0.107                 |
| Turbidity (NTU)                     | $96.3 \pm 30.4$                                    | $69.4 \pm 82.9$                       | 0.826                 |
| Temperature ( °C)                   | $21.3 \pm 0.8$                                     | $21.3 \pm 0.3$                        | 0.942                 |
| pH value                            | $7.9 \pm 0.2$                                      | $7.9 \pm 0.3$                         | 0.883                 |

Note: # Mean  $\pm$  SD.

**Table S2.** The detection results of two procedures.

| Detection Result |          | With IMS |          |
|------------------|----------|----------|----------|
|                  |          | Positive | Negative |
| Without IMS      | Positive | 4        | 2        |
|                  | Negative | 12       | 16       |

**Figure S1.** Positive samples of the procedures with and without IMS. The bacteria quantity in each sample was also shown.

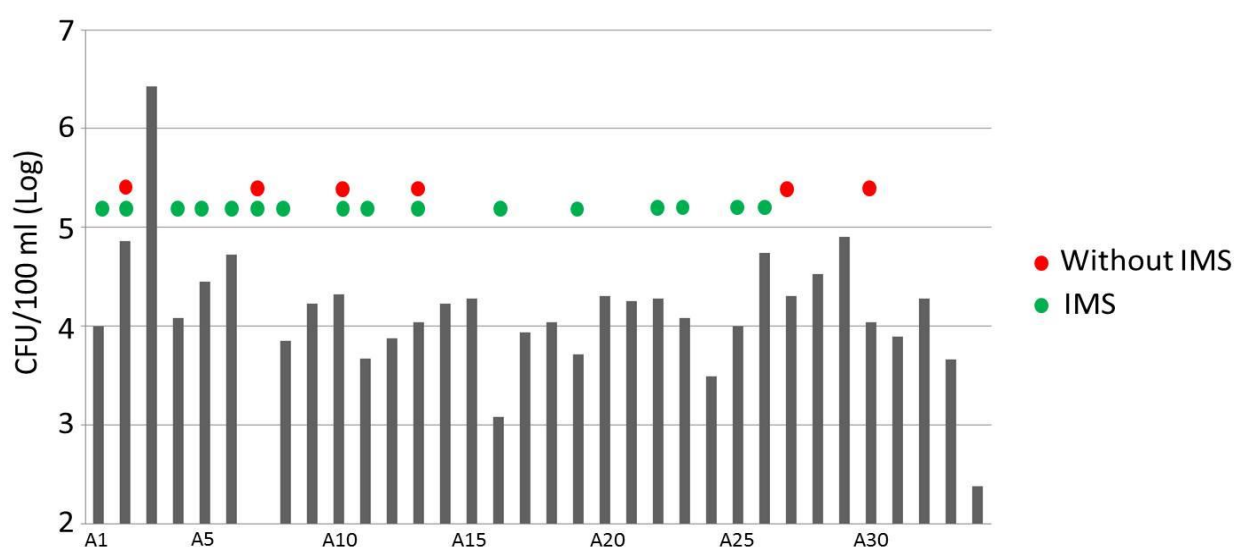

Supplement: Supplementary File 1 [file ijerph-11-09811-s001.pdf]
